# Supplementary material for: Uncovering the Gut–Liver Axis Biomarkers for Predicting Metabolic Burden in Mice
Source: MDPI journal article supplement (doi:10.3390/nu15153406), 2023-07-31
Supplement: s1 [file s1]

Figure S1

(A)

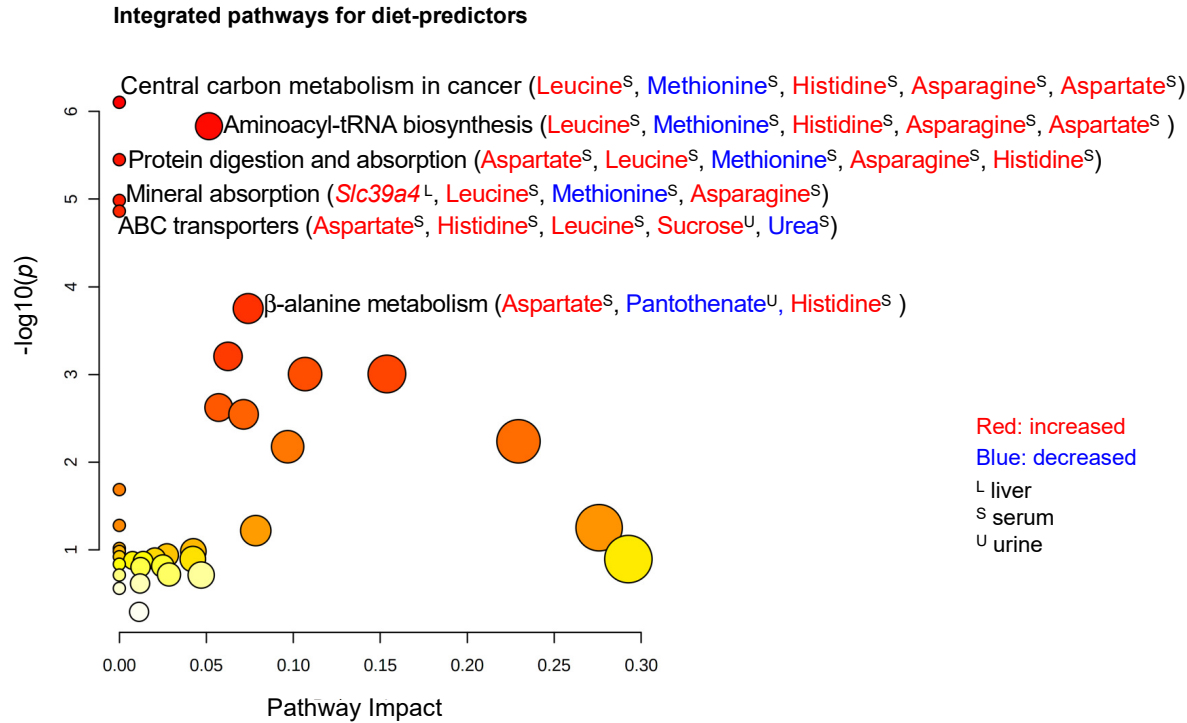

(B)

Diet predictors  
Human diseases-related metabolites

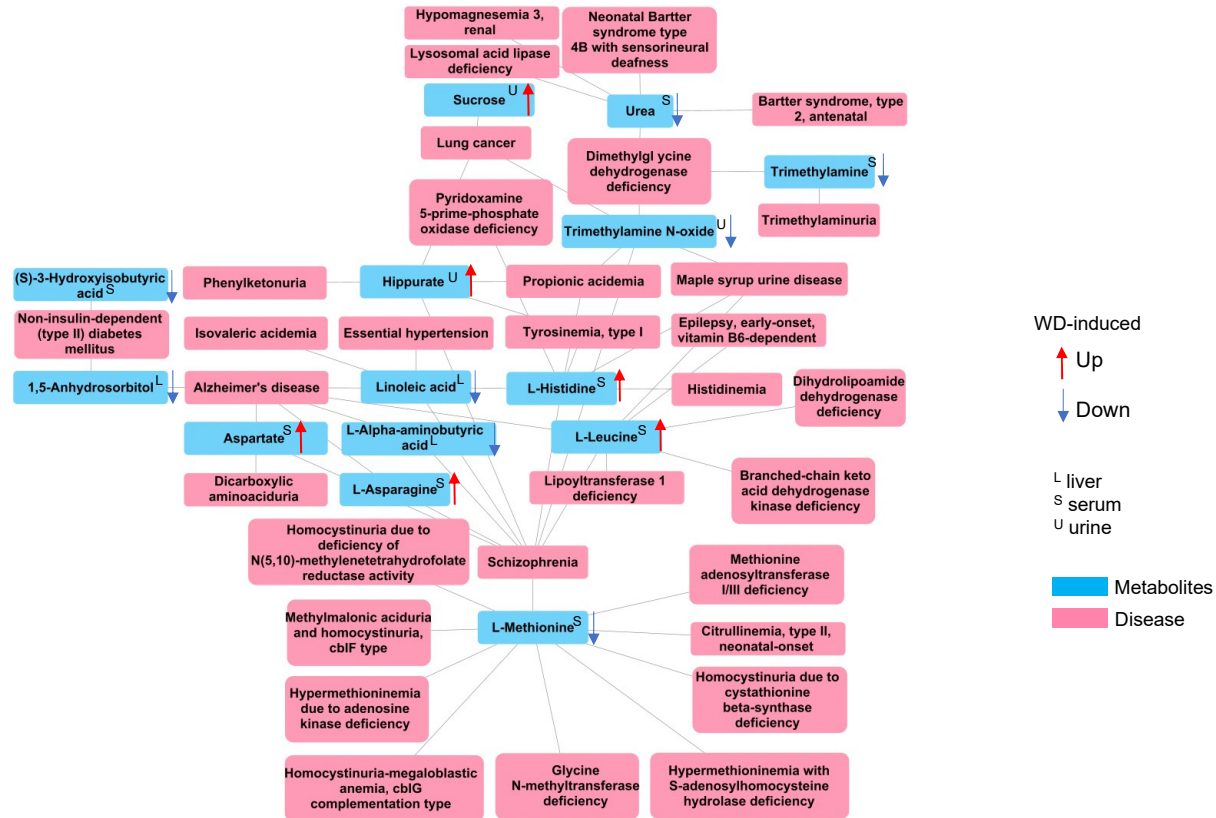

**Figure S1. Functional analysis of diet predictors.** (A) Integrated pathway analysis showing pathways for WD-predictors (transcripts and metabolites). The corresponding features for the important pathways are indicated. (B) The network shows that metabolomic predictors of WD intake are associated with human diseases.

**Figure S2**

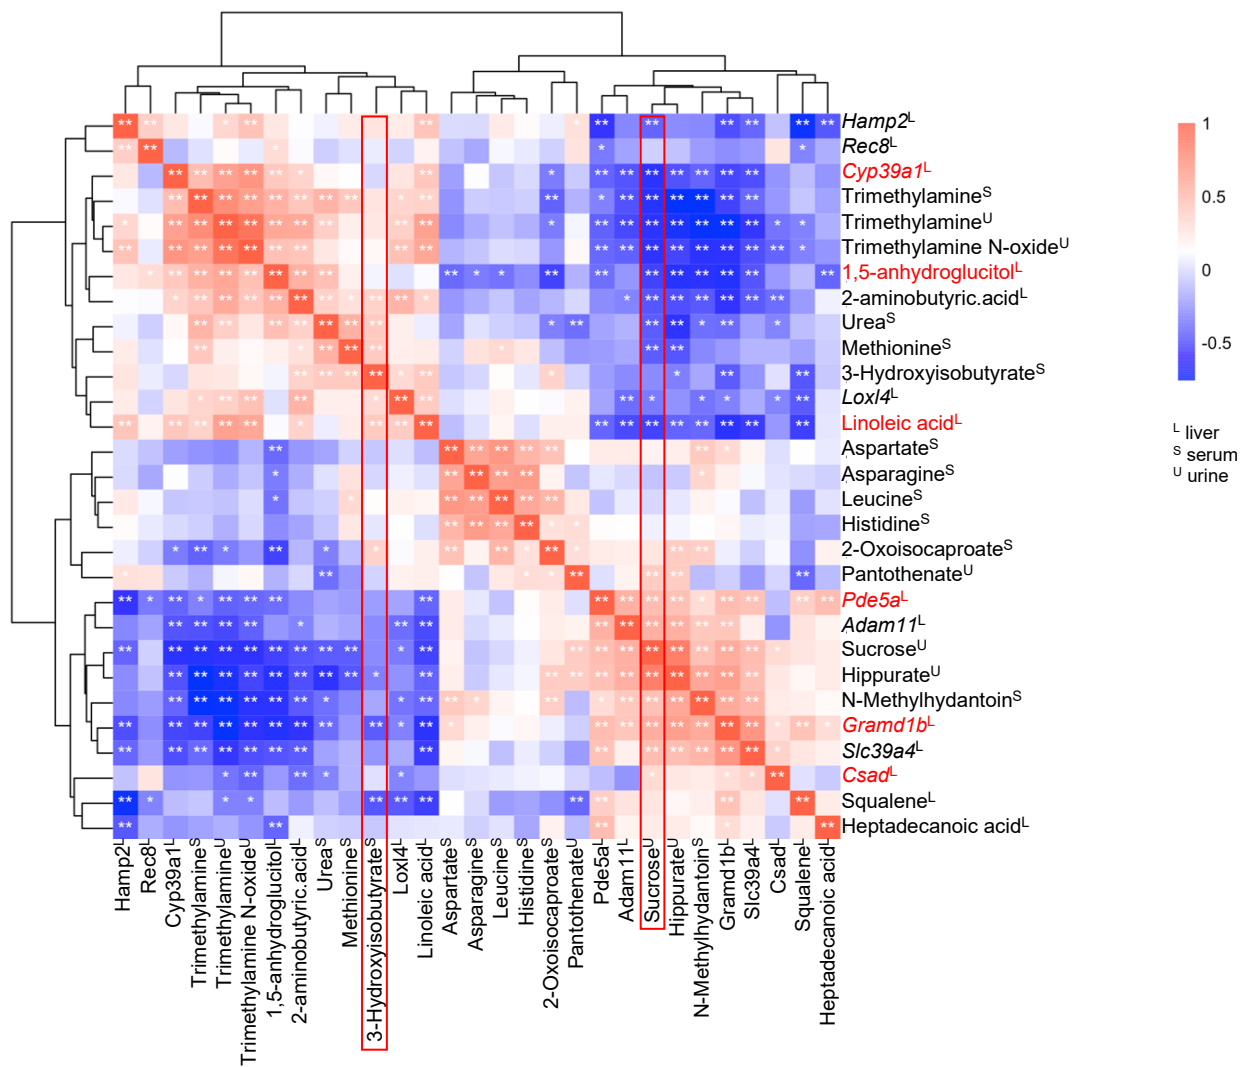

Figure S2. Spearman’s correlation for WD-predictors from the liver, serum, and urine. Spearman’s correlation, \* $p < 0.05$ , \*\* $p < 0.01$ .

Figure S3

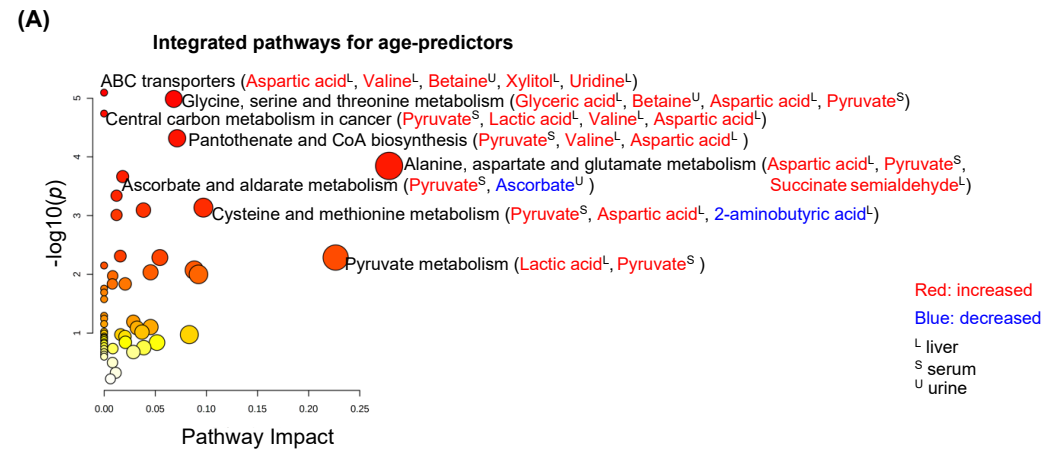

(B)

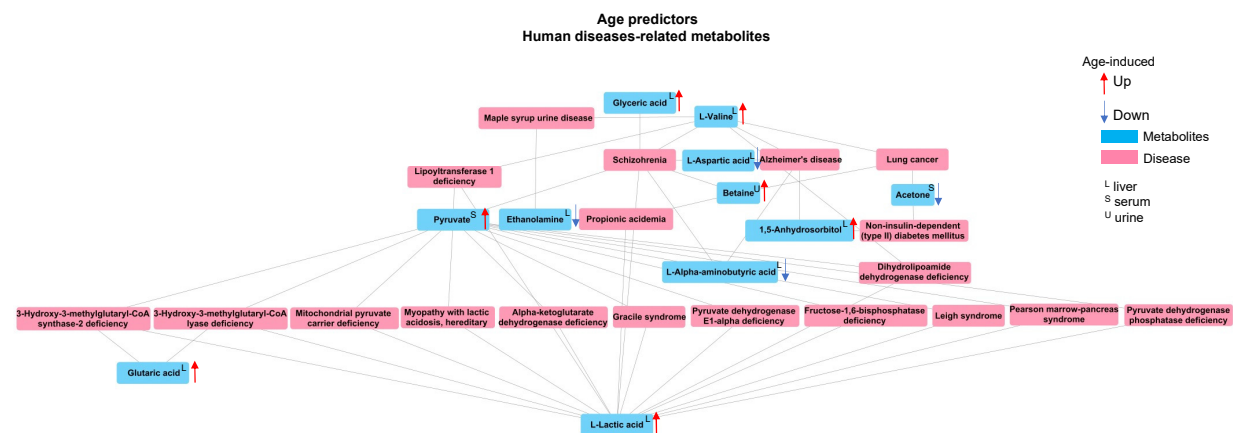

**Figure S3. Functional analysis of age-predictors.** (A) Integrated pathway analysis for age-predictors (metabolites). (B) Features that can classify ages in association with human diseases.

**Figure S4**

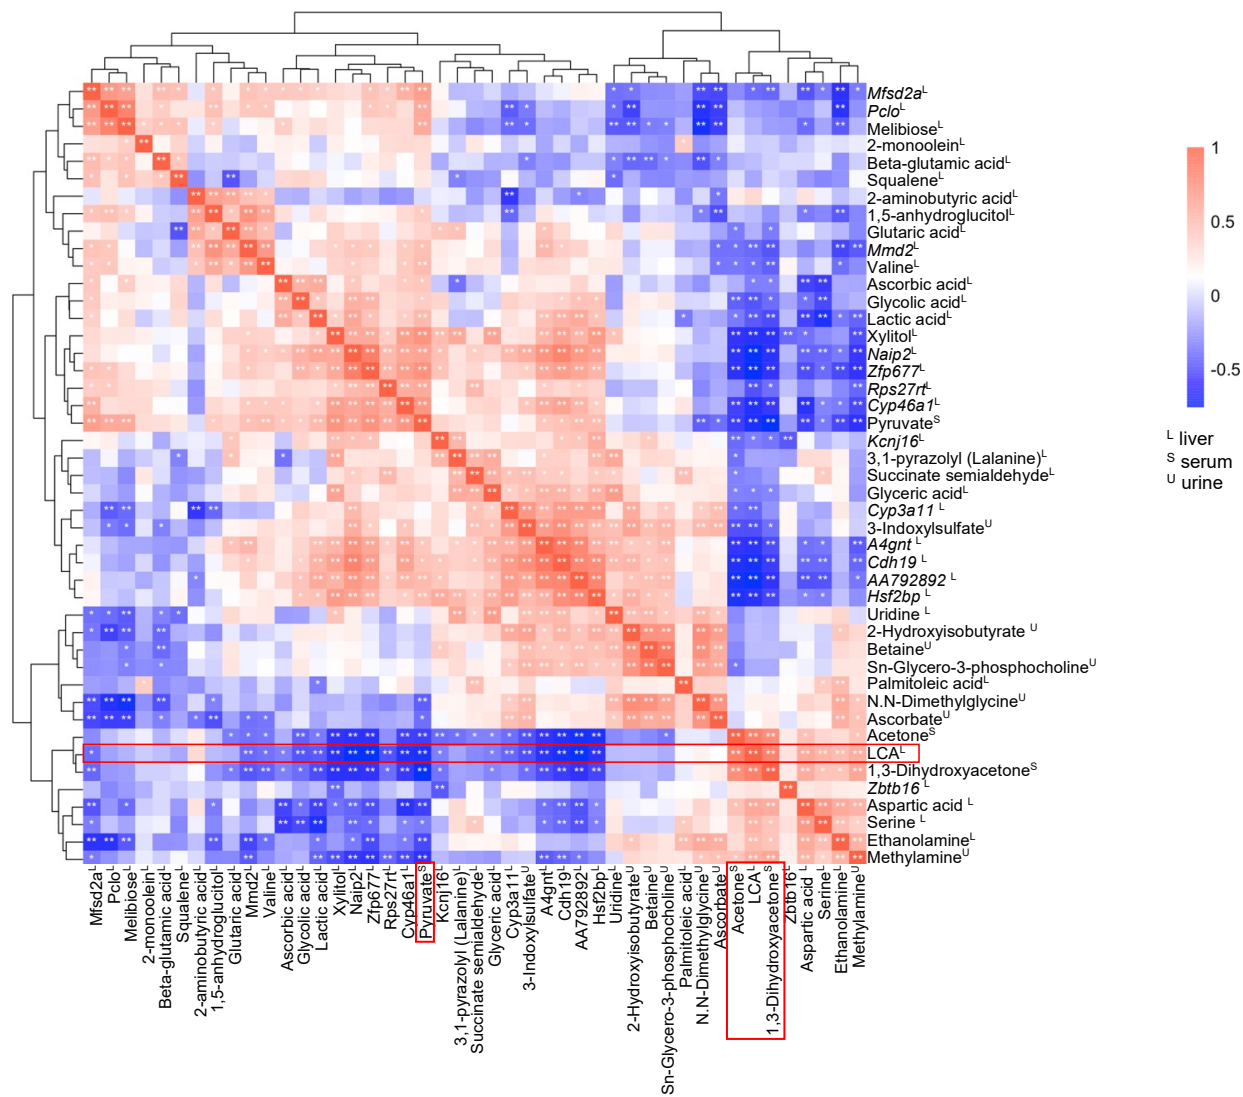

**Figure S4. Interaction between features that can be used for chronological age prediction.** Spearman's correlation, \* $p < 0.05$ , \*\* $p < 0.01$ .

**Figure S5**

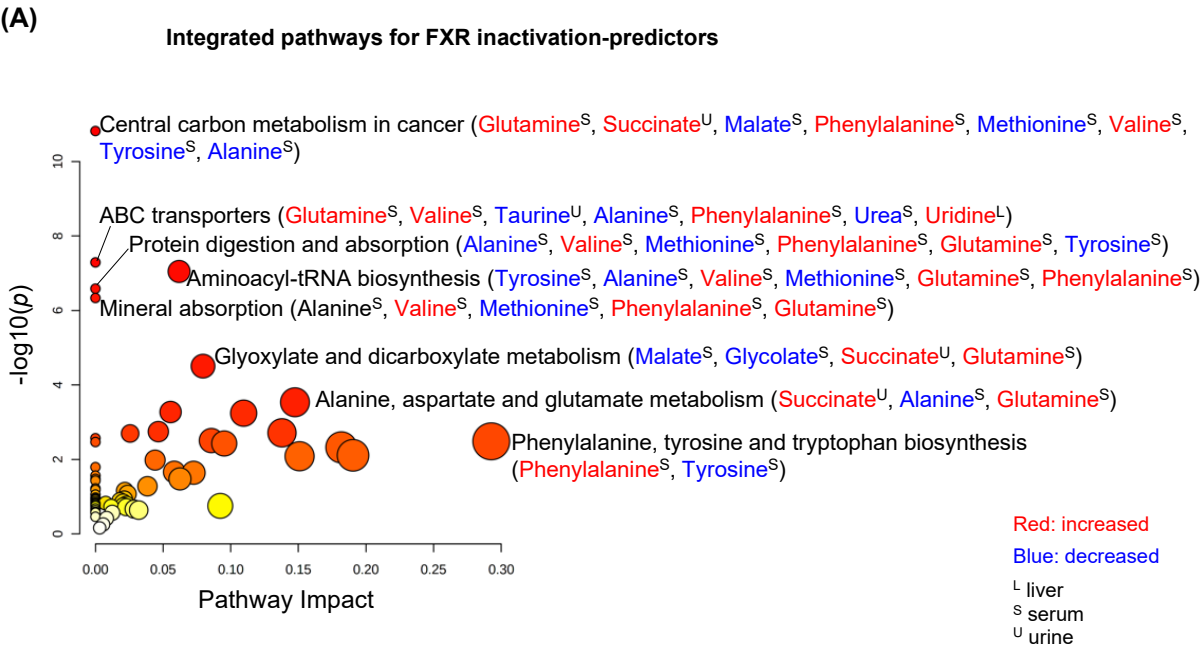



(B)

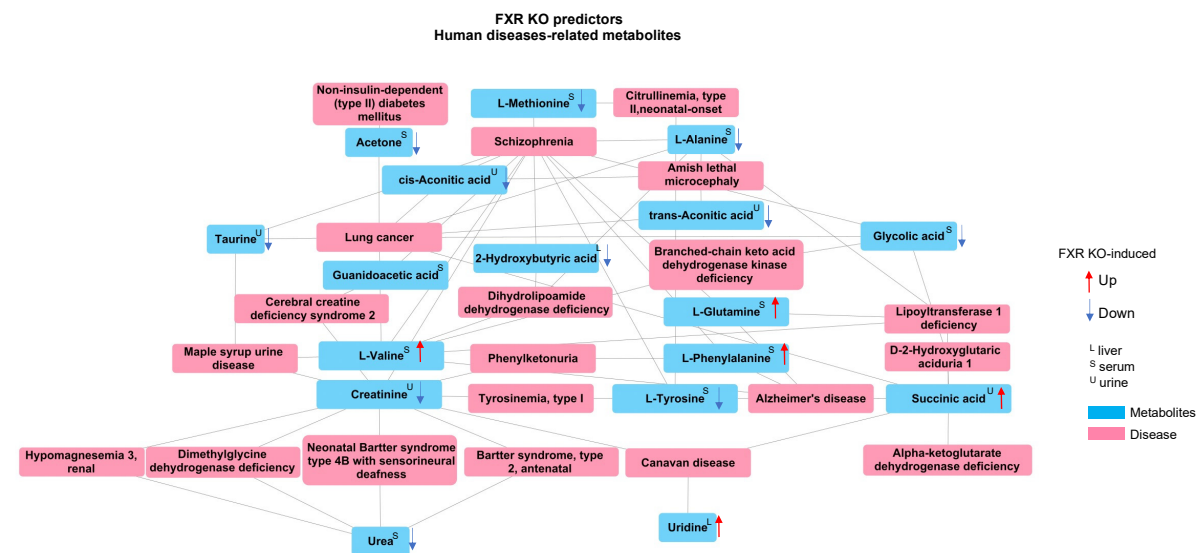

**Figure S5. Functional analysis of FXR expression predictors.** (A) The pathways for metabolites serve as FXR expression predictors. (B)

The network shows the interaction between metabolites and diseases for FXR expression predictors.

**Figure S6**

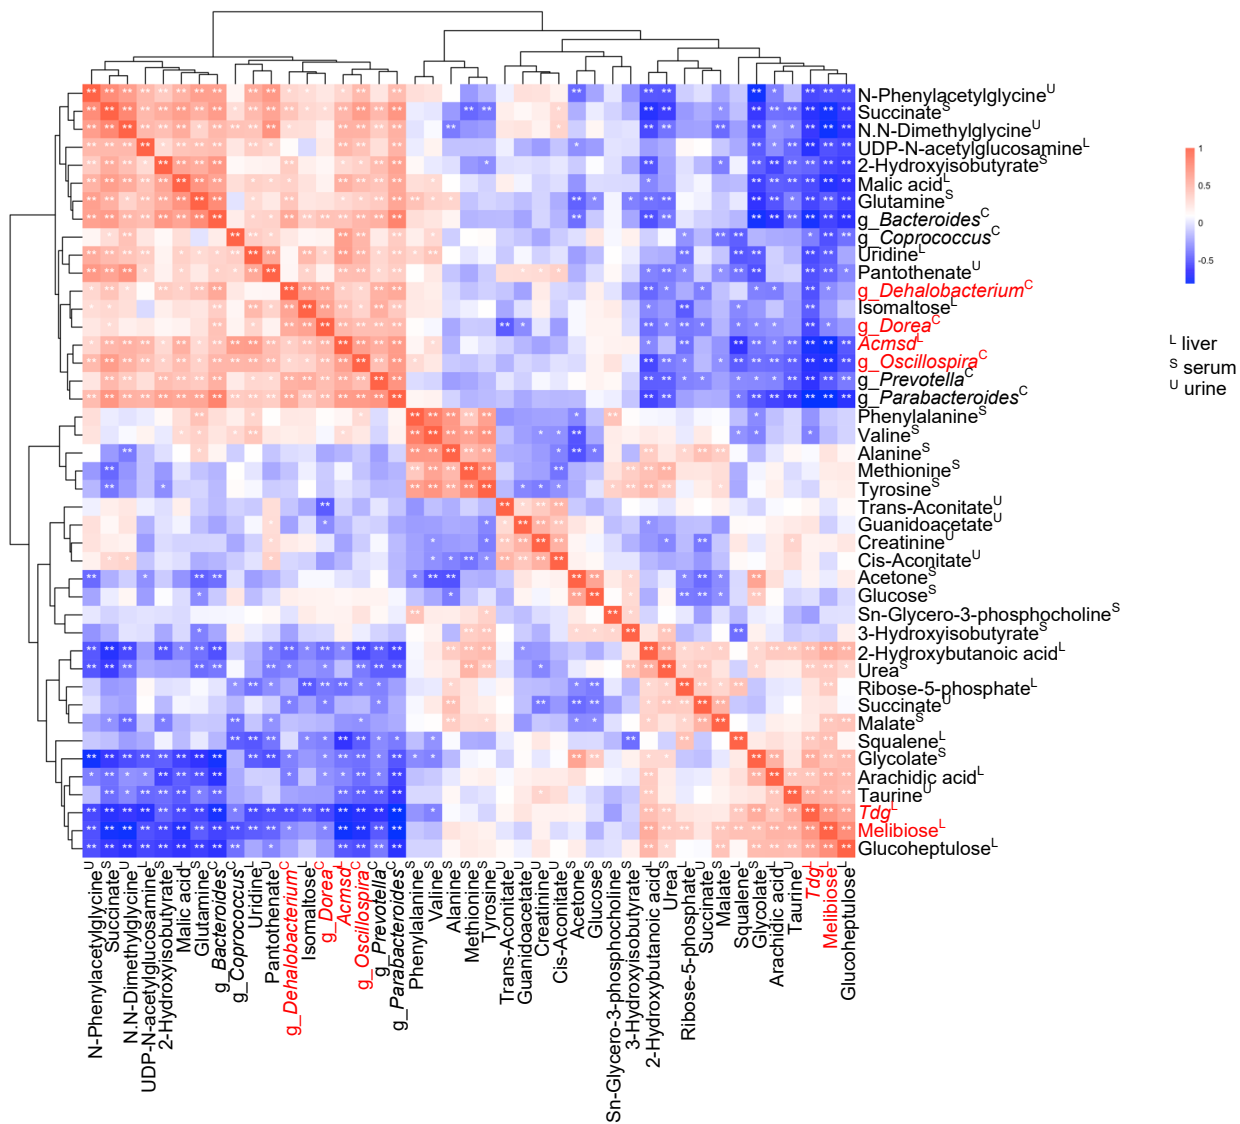

**Figure S6. Interactions of FXR expression predictors.** Spearman's correlation between cecal microbiota at the genus level, hepatic transcripts, and metabolites from the liver, serum, and urine. \* $p < 0.05$ , \*\* $p < 0.01$ .

**Table S1. Samples for multi-omics data from the mouse model.**

| <b>Omics</b>               | <b>Number of mice</b> | <b>Age (month)</b> | <b>Diet</b> | <b>Genotype</b> |
|----------------------------|-----------------------|--------------------|-------------|-----------------|
| <b>Hepatic transcripts</b> | 48                    | 5, 10, 15          | CD, WD      | WT, FXR KO      |
| <b>Metabolites</b>         |                       |                    |             |                 |
| Bile acids (liver)         | 186                   | 5, 10, 15          | CD, WD      | WT, FXR KO      |
| Liver                      | 72                    | 5, 10, 15          | CD, WD      | WT, FXR KO      |
| Serum                      | 122                   | 5, 10, 15          | CD, WD      | WT, FXR KO      |
| Urine                      | 157                   | 5, 10, 15          | CD, WD      | WT, FXR KO      |
| <b>Microbiota</b>          | 163                   | 5, 10, 15          | CD, WD      | WT, FXR KO      |

**Table S2. Hepatic transcripts that classify diet, age, and FXR activity.**

| <b>Transcript name</b> | <b>Protein name</b>                          | <b>Functions</b>                                                                                                                                                                 | <b>Changes</b>      | <b>Diseases implications</b>                                                                                                                        |
|------------------------|----------------------------------------------|----------------------------------------------------------------------------------------------------------------------------------------------------------------------------------|---------------------|-----------------------------------------------------------------------------------------------------------------------------------------------------|
| <i>Cyp39a1</i>         | 24-hydroxycholesterol 7-alpha-hydroxylase    | Steroid metabolism; cholesterol degradation; lipid metabolism; bile acid biosynthesis                                                                                            | Western diet (Down) | CYP39A1 is an HCC suppressor in humans [1].<br>CYP39A1 is an HCC biomarker [2].                                                                     |
| <i>Pde5a</i>           | cGMP-specific 3',5'-cyclic phosphodiesterase | Purine metabolism, plays a role in signal transduction by regulating the intracellular concentration of cyclic nucleotides                                                       | Western diet (Up)   | -                                                                                                                                                   |
| <i>Csad</i>            | Cysteine sulfinic acid decarboxylase         | Organosulfur biosynthesis; taurine biosynthesis                                                                                                                                  | Western diet (Up)   | CSAD is protective in NAFLD [3].                                                                                                                    |
| <i>Gramd1b</i>         | Protein Aster-B                              | Cholesterol transporter that mediates non-vesicular transport of cholesterol from the plasma membrane to the endoplasmic reticulum                                               | Western diet (Up)   | -                                                                                                                                                   |
| <i>Slc39a4</i>         | Zinc transporter ZIP4                        | ZIP4 (SLC39A4) may play a role in the acquisition of zinc by hepatocellular carcinomas, leading to repressed apoptosis, enhanced growth rate and enhanced invasive behavior [4]. | Western diet (Up)   | SLC39A4 is involved in the pathogenesis of acrodermatitis enteropathica, zinc-deficiency type [5–7].<br>SLC39A4 expression is activated in HCC [4]. |
| <i>Hamp2</i>           | Hepcidin-2                                   | Antimicrobial                                                                                                                                                                    | Western diet (Down) | -                                                                                                                                                   |
| <i>Loxl4</i>           | Lysyl oxidase homolog 4                      | Crosslinking of collagen fibrils; Elastic fibre formation                                                                                                                        | Western diet (Down) | LOXL4 expression is increased during the liver carcinogenesis [8].                                                                                  |

|                 |                                                                |                                                                                               |                        |                                                                                                                                                         |
|-----------------|----------------------------------------------------------------|-----------------------------------------------------------------------------------------------|------------------------|---------------------------------------------------------------------------------------------------------------------------------------------------------|
| <i>Rec8</i>     | Meiotic recombination protein<br>REC8 homolog                  | Meiotic synapsis                                                                              | Western diet<br>(Down) | REC8 promotes tumor migration, invasion, and angiogenesis in human HCC [9].                                                                             |
| <i>Adam11</i>   | Disintegrin and metalloproteinase domain-containing protein 11 | LGI (leucine-rich glioma inactivated)-ADAM interactions                                       | Western diet<br>(Up)   | -                                                                                                                                                       |
| <i>Zbtb16</i>   | Zinc finger and BTB domain-containing protein 16               | Energy metabolism regulator                                                                   | Aging (Down)           | ZBTB16 associate with increased obesity-related parameters and elevated total and low-density lipoprotein cholesterol [10].                             |
| <i>Rps27rt</i>  | Ribosomal Protein S27                                          | RNA binding and structural constituent of ribosome                                            | Aging (Up)             | -                                                                                                                                                       |
| <i>Naip2</i>    | Baculoviral IAP repeat-containing protein 1b                   | Inflammatory response; Innate immunity; Apoptosis                                             | Aging (Up)             | -                                                                                                                                                       |
| <i>Cyp46a1</i>  | Cholesterol 24-hydroxylase                                     | Steroid metabolism; cholesterol degradation; Lipid metabolism; C21-steroid hormone metabolism | Aging (Up)             | <i>Cyp46</i> gene levels were higher in the hippocampus of elderly humans and in patients with certain pathological, neurodegenerative conditions [11]. |
| <i>Mmd2</i>     | Monocyte to macrophage differentiation factor 2                | Positive regulation of Ras protein signal transduction                                        | Aging (Up)             | -                                                                                                                                                       |
| <i>AA792892</i> | Expressed sequence<br>AA792892                                 |                                                                                               | Aging (Up)             | -                                                                                                                                                       |
| <i>A4gnt</i>    | Alpha-1,4-N-acetylglucosaminyltransferase                      | O-linked glycosylation of mucins                                                              | Aging (Up)             | -                                                                                                                                                       |

|                |                                                      |                                                                                                                                                                     |            |                                                                                                                                                                                                                                                           |
|----------------|------------------------------------------------------|---------------------------------------------------------------------------------------------------------------------------------------------------------------------|------------|-----------------------------------------------------------------------------------------------------------------------------------------------------------------------------------------------------------------------------------------------------------|
| <i>Cdh19</i>   | Cadherin-19                                          | Wnt signaling pathway; Cadherin signaling pathway                                                                                                                   | Aging (Up) | -                                                                                                                                                                                                                                                         |
| <i>Pclo</i>    | Protein piccolo                                      | Component of the presynaptic cytoskeletal matrix, involved in regulation of presynaptic proteins and synaptic vesicles                                              | Aging (Up) | Loss of PCLO causes pontocerebellar hypoplasia 3 in humans [12];<br><i>Pclo</i> is highly mutated as cancer driver gene in hepatitis B virus-related HCC patients [13].                                                                                   |
| <i>Zfp677</i>  | Uncharacterized protein                              | -                                                                                                                                                                   | Aging (Up) | -                                                                                                                                                                                                                                                         |
| <i>Cyp3a11</i> | Cytochrome P450 3A11                                 | Xenobiotics; Aflatoxin activation and detoxification; Biosynthesis of maresin-like SPMs                                                                             | Aging (Up) | The mRNA expression of hepatic <i>Cyp3a11</i> is increased high-fat and high-sucrose induced NAFLD mouse model [14].                                                                                                                                      |
| <i>Hsf2bp</i>  | Heat shock factor 2-binding protein                  | Double-strand break repair involved in meiotic recombination                                                                                                        | Aging (Up) | -                                                                                                                                                                                                                                                         |
| <i>Kcnj16</i>  | Inward rectifier potassium channel 16                | Potassium transport channels; Activation of G protein gated Potassium channels; Inhibition of voltage gated Ca <sup>2+</sup> channels via G $\beta$ /gamma subunits | Aging (Up) | <i>Kcnj16</i> level is lower in HCC tumor tissues compared to adjacent tissues from HCC patients [15]. <i>Kcnj16</i> mutation cause a novel tubulopathy with hypokalemia, salt wasting, disturbed acid-base homeostasis, and sensorineural deafness [16]. |
| <i>Mfsd2a</i>  | Sodium-dependent lysophosphatidylcholine symporter 1 | Glycerophospholipid biosynthesis                                                                                                                                    | Aging (Up) | The MFSD2A level in HCC patients is lower than in healthy controls [17].                                                                                                                                                                                  |

|              |                                                        |                                                       |               |                                                               |
|--------------|--------------------------------------------------------|-------------------------------------------------------|---------------|---------------------------------------------------------------|
| <i>Acmsd</i> | 2-amino-3-carboxymuconate-6-semialdehyde decarboxylase | Secondary metabolite metabolism; quinolate metabolism | FXR KO (Up)   | Inhibiting ACMSD protects liver injury in mouse models [18].  |
| <i>Tdg</i>   | G/T mismatch-specific thymine DNA glycosylase          | DNA demethylation                                     | FXR KO (Down) | Conditional knockout of Tdg causes HCC in a mouse model [19]. |

HCC, hepatocellular carcinoma; NAFLD, nonalcoholic liver disease; -, unknown.

## References

1. Ji F, Zhang J, Liu N, et al. Blocking hepatocarcinogenesis by a cytochrome P450 family member with female-preferential expression. *Gut* 2022;71:2313-2324.
2. Li D, Yu T, Hu J, et al. Downregulation of CYP39A1 serves as a novel biomarker in hepatocellular carcinoma with worse clinical outcome. *Oxid Med Cell Longev* 2021;2021:5175581.
3. Tan R, Li J, Liu L, et al. CSAD ameliorates lipid accumulation in high-fat diet-fed mice. *Int J Mol Sci* 2022;23.
4. Weaver BP, Zhang Y, Hiscox S, et al. Zip4 (Slc39a4) expression is activated in hepatocellular carcinomas and functions to repress apoptosis, enhance cell cycle and increase migration. *PLoS One* 2010;5.
5. Wang K, Zhou B, Kuo YM, et al. A novel member of a zinc transporter family is defective in acrodermatitis enteropathica. *Am J Hum Genet* 2002;71:66-73.
6. Küry S, Dréno B, Bézieau S, et al. Identification of SLC39A4, a gene involved in acrodermatitis enteropathica. *Nat Genet* 2002;31:239-240.
7. Nakano A, Nakano H, Nomura K, et al. Novel SLC39A4 mutations in acrodermatitis enteropathica. *J Invest Dermatol* 2003;120:963-966.
8. Tan HY, Wang N, Zhang C, et al. Lysyl Oxidase-Like 4 Fosters an Immunosuppressive Microenvironment During Hepatocarcinogenesis. *Hepatology* 2021;73:2326-2341.
9. Han J, Bai Y, Wang J, et al. REC8 promotes tumor migration, invasion and angiogenesis by targeting the PKA pathway in hepatocellular carcinoma. *Clin Exp Med* 2021;21:479-492.
10. Bendlová B, Vaňková M, Hill M, et al. ZBTB16 gene variability influences obesity-related parameters and serum lipid levels in Czech adults. *Physiol Res* 2017;66:S425-s31.
11. Palomer E, Martín-Segura A, Baliyan S, et al. Aging triggers a repressive chromatin state at bdnf promoters in hippocampal neurons. *Cell Rep*



2016;16:2889-2900.

12. Ahmed MY, Chioza BA, Rajab A, et al. Loss of PCLO function underlies pontocerebellar hypoplasia type III. *Neurology* 2015;84:1745-1750.
13. Kong F, Kong D, Yang X, et al. Integrative analysis of highly mutated genes in hepatitis B virus-related hepatic carcinoma. *Cancer Med* 2020;9:2462-2479.
14. Chiba T, Noji K, Shinozaki S, et al. Diet-induced non-alcoholic fatty liver disease affects expression of major cytochrome P450 genes in a mouse model. *J Pharm Pharmacol* 2016;68:1567-1576.
15. Sun Y, Chen ZY, Gan X, et al. A novel four-gene signature for predicting the prognosis of hepatocellular carcinoma. *Scand J Gastroenterol* 2022;57:1227-1237.
16. Schlingmann KP, Renigunta A, Hoorn EJ, et al. Defects in KCNJ16 cause a novel tubulopathy with hypokalemia, salt wasting, disturbed acid-base homeostasis, and sensorineural deafness. *J Am Soc Nephrol* 2021;32:1498-1512.
17. Xing S, Kan J, Su A, et al. The prognostic value of major facilitator superfamily domain-containing protein 2A in patients with hepatocellular carcinoma. *Aging (Albany NY)* 2019;11:8474-8483.
18. Katsyuba E, Mottis A, Zietak M, et al. De novo NAD<sup>+</sup> synthesis enhances mitochondrial function and improves health. *Nature* 2018;563:354-359.
19. Hassan HM, Isovici M, Kolendowski B, et al. Loss of thymine DNA glycosylase causes dysregulation of bile acid homeostasis and hepatocellular carcinoma. *Cell Rep* 2020;31:107475.

**Table S3. Metabolites that classify diet, age, and FXR activity.**

| <b>Metabolites<br/>(Specimens)</b> | <b>Source</b>                                                                                                           | <b>Functions or Roles</b>                                                                                                                               | <b>Changes</b>                                   | <b>Disease implications</b>                                                                                                                                                                                                                                                                         |
|------------------------------------|-------------------------------------------------------------------------------------------------------------------------|---------------------------------------------------------------------------------------------------------------------------------------------------------|--------------------------------------------------|-----------------------------------------------------------------------------------------------------------------------------------------------------------------------------------------------------------------------------------------------------------------------------------------------------|
| 1,5-anhydroglucitol<br>(Liver)     | Mainly from food, well absorbed in the intestine, and is distributed to all organs and tissues.                         | A glycemic marker                                                                                                                                       | Western diet (Down)<br>Aging (Up)                | Serum 1,5-anhydroglucitol concentrations are lower in cirrhotic and chronic liver disease patients than those in healthy people [1,2]. Low serum 1,5-anhydroglucitol concentration is a predictor of short-term mortality in Hepatitis B virus-related acute-on-chronic liver failure patients [3]. |
| Linoleic acid<br>(Liver)           | Hydrogenated vegetable oils                                                                                             | An omega-6 trans fatty acid; $\alpha$ -linolenic acid and linoleic acid metabolism                                                                      | Western diet (Down)                              | Dietary conjugated linoleic acid protects the liver from NAFLD in a rat model [4].                                                                                                                                                                                                                  |
| Squalene<br>(Liver)                | Human sebum (5%), fish liver oils, yeast lipids, and many vegetable oils (e.g., palm oil, cottonseed oil, rapeseed oil) | A biochemical precursor to the whole family of steroids; An intermediate for cholesterol synthesis; A precursor to phytosterol synthesis; A bactericide | Western diet (Up)<br>Aging (Up)<br>FXR KO (Down) | Squalene decreases hepatic cholesterol and triglycerides [5].                                                                                                                                                                                                                                       |
| Heptadecanoic acid<br>(Liver)      | Exogenous origin, such as dairy fats (milk and meat)                                                                    | A saturated fatty acid                                                                                                                                  | Western diet (Up)                                | Biomarkers for dietary food (fat) intake assessment; Biomarkers for coronary heart disease risk and type II diabetes mellitus risk [6].                                                                                                                                                             |

|                                 |                                                                                                                                                                                                          |                                                                                                                                                   |                                         |                                                                                                                                     |
|---------------------------------|----------------------------------------------------------------------------------------------------------------------------------------------------------------------------------------------------------|---------------------------------------------------------------------------------------------------------------------------------------------------|-----------------------------------------|-------------------------------------------------------------------------------------------------------------------------------------|
| 2-aminobutyric acid<br>(Liver)  | Biosynthesized by transamination of oxobutyrate; A metabolite in isoleucine biosynthesis; A non-essential amino acid that is primarily derived from the catabolism of methionine, threonine, and serine. | A non-proteinogenic $\alpha$ -amino acid                                                                                                          | Western diet<br>(Down)                  | -                                                                                                                                   |
| Trimethylamine<br>(Serum)       | A product of decomposition of plants and animals; A bacteria metabolite                                                                                                                                  | A colorless, hygroscopic, and flammable simple amine with a typical fishy odor in low concentrations; Ammonia like odor in higher concentrations. | Western diet<br>(Down)                  | NAFLD patients have increased trimethylamine in the intestine and liver [7].                                                        |
| 3-Hydroxyisobutyrate<br>(Serum) | An intermediate in L-valine metabolism                                                                                                                                                                   | Valine, leucine, and isoleucine degradation                                                                                                       | Western diet<br>(Down)<br>FXR KO (Down) | Plasma 3-hydroxyisobutyrate is a marker of hepatic mitochondrial fatty acid oxidation in male Wistar rats [8].                      |
| Aspartate<br>(Serum)            | Found in all organisms ranging from bacteria to plants to animals; Nonessential amino acid derived from glutamic acid by enzymes using vitamin B6.                                                       | Proteinogenic $\alpha$ -amino acid; Arginine and proline metabolism; Aspartate metabolism; Urea cycle                                             | Western diet (Up)                       | Administration of L-aspartate in vitro or in mice efficiently ameliorates metabolic dysfunction-associated fatty liver disease [9]. |

|                              |                                                                                                                                             |                                                                                                                                                         |                                      |                                                                                                            |
|------------------------------|---------------------------------------------------------------------------------------------------------------------------------------------|---------------------------------------------------------------------------------------------------------------------------------------------------------|--------------------------------------|------------------------------------------------------------------------------------------------------------|
| Leucine<br>(Serum)           | Essential amino acid; Human dietary sources are foods that contain protein, such as meats, dairy products, soy products, beans and legumes. | A branched chain amino acid; Proteinogenic $\alpha$ -amino acid; Valine, leucine, and isoleucine degradation                                            | Western diet (Up)                    | L-leucine supplementation is protective in patients with liver cirrhosis [10].                             |
| Histidine<br>(Serum)         | Essential amino acid; Exogenous food, such as fruits (berries)                                                                              | $\alpha$ -amino acid; Histidine metabolism; Nitrogen metabolism; Beta-alanine metabolism; Anti-oxidant, anti-inflammatory and anti-secretory properties | Western diet (Up)                    | Histidine supplementation ameliorates metabolic syndrome [11].                                             |
| Urea<br>(Serum)              | Exogenous food, such as berries                                                                                                             | Urea cycle; Arginine and proline metabolism                                                                                                             | Western diet (Down)<br>FXR KO (Down) | Urea cycle disorders [12].                                                                                 |
| 2-Oxoisocaproate<br>(Serum)  | Endogenously produced metabolite                                                                                                            | Valine, leucine, and isoleucine degradation; A neurotoxin and a metabotoxin.                                                                            | Western diet (Up)                    | Plasma 2-oxoisocaproate (ketoleucine) concentrations are increased in patients with metabolic stress [13]. |
| N-Methylhydantoin<br>(Serum) | Exogenous, such as animal foods.                                                                                                            | A bacterial metabolite; A imidazolidine-2,4-dione that is the N-methyl-derivative of hydantoin.                                                         | Western diet (Up)                    | -                                                                                                          |
| Methionine<br>(Serum)        | Essential amino acid; Exogenous food such as                                                                                                | Proteinogenic $\alpha$ -amino acid; Glycine, serine, and                                                                                                | Western diet (Down)                  | NAFLD patients have low liver methionine concentrations [14].                                              |

|                                |                                                                                                        |                                                                                                                                                                 |                     |                                                                                                                                          |
|--------------------------------|--------------------------------------------------------------------------------------------------------|-----------------------------------------------------------------------------------------------------------------------------------------------------------------|---------------------|------------------------------------------------------------------------------------------------------------------------------------------|
|                                | berries; An intermediate in transmethylation reactions                                                 | threonine metabolism; Methionine metabolism                                                                                                                     | FXR KO (Down)       |                                                                                                                                          |
| Asparagine (Serum)             | Non-essential amino acid, the precursor to asparagine is oxaloacetate; Exogenous food such as berries  | Proteinogenic $\alpha$ -amino acid; Aspartate metabolism; Nitrogen metabolism; Ammonia recycling                                                                | Western diet (Up)   | Upregulating asparagine synthetase is beneficial for alleviating liver injury [15].                                                      |
| Sucrose (Urine)                | From sugarcane ( <i>Saccharum officinarum</i> ), sugar beet ( <i>Beta vulgaris</i> ), and other plants | Sucrose is a sweetener and used in food products as a preservative, antioxidant, moisture control agent, stabilizer, and thickening agent; Galactose metabolism | Western diet (Up)   | Excessive sucrose intake leads to NAFLD [16].                                                                                            |
| Trimethylamine (Urine)         | Decomposition of plants and animals                                                                    | A uremic toxin; A marker for urinary tract infection brought on by <i>E. coli</i> .                                                                             | Western diet (Down) | Trimethylamine in the intestine and liver is increased in NAFLD patients [7].                                                            |
| Trimethylamine N-oxide (Urine) | Biosynthesized endogenously from trimethylamine, which is derived from choline.                        | A uremic toxin; TMAO alters cholesterol metabolism in the intestines, in the liver and in arterial wall.                                                        | Western diet (Down) | Trimethylamine-N-oxide promotes brain aging and cognitive impairment in mice [17]. TMAO supplementation aggravates liver steatosis [18]. |
| Hippurate (Urine)              | Produced from the metabolism of benzoate, which is mainly stored in the liver mitochondria.            | Reflect hepatic function                                                                                                                                        | Western diet (Up)   | Elevated blood hippurate associates with improved hepatic steatosis and good metabolic health [19].                                      |

|                                       |                                                                                                                                                                          |                                                                                                                                                              |                                    |                                                                                                                                |
|---------------------------------------|--------------------------------------------------------------------------------------------------------------------------------------------------------------------------|--------------------------------------------------------------------------------------------------------------------------------------------------------------|------------------------------------|--------------------------------------------------------------------------------------------------------------------------------|
|                                       |                                                                                                                                                                          |                                                                                                                                                              |                                    |                                                                                                                                |
| Pantothenate<br>Vitamin B5<br>(Urine) | From everywhere and small quantities of pantothenic acid are found in nearly every food, with high amounts in whole grain cereals, legumes, eggs, meat, and royal jelly. | A water-soluble vitamin required to sustain life; Beta-alanine metabolism; Pantothenate and CoA biosynthesis                                                 | Western diet (Down)<br>FXR KO (Up) | -                                                                                                                              |
| Succinate semialdehyde<br>(Liver)     | An intermediate in the catabolism of gamma-aminobutyrate or gamma-aminobutyric acid                                                                                      | High levels of succinate semialdehyde function as a neurotoxin and a metabotoxin.                                                                            | Aging (Up)                         | -                                                                                                                              |
| Xylitol<br>(Liver)                    | Xylitol exists in all living species, ranging from bacteria to plants to humans.                                                                                         | Organism's growth, development, or reproduction                                                                                                              | Aging (Up)                         | -                                                                                                                              |
| Valine<br>(Liver)                     | Essential amino acid; Human dietary sources are foods that contain protein, such as meats, dairy products, soy products, beans and legumes.                              | Proteinogenic $\alpha$ -amino acid; Branched chain amino acid; Valine, leucine, and isoleucine degradation; Propanoate metabolism; Transcription/Translation | Aging (Up)                         | Excessive valine causes NAFLD [20].                                                                                            |
| Glyceric acid (Liver)                 | Obtained from oxidation of glycerol.                                                                                                                                     | Glycine, serine, and threonine metabolism; Glycerolipid metabolism                                                                                           | Aging (Up)                         | Oral D-glyceric acid activates mitochondrial metabolism and reduces inflammation among 50-60-year-old healthy volunteers [21]. |

|                       |                                                                                                                             |                                                                                                                                                        |              |                                                                           |
|-----------------------|-----------------------------------------------------------------------------------------------------------------------------|--------------------------------------------------------------------------------------------------------------------------------------------------------|--------------|---------------------------------------------------------------------------|
|                       |                                                                                                                             |                                                                                                                                                        |              |                                                                           |
| Aspartic acid (Liver) | Aspartic acid is found in all organisms ranging from bacteria to plants to animals.                                         | Proteinogenic $\alpha$ -amino acid;<br>Transcription/translation;<br>Arginine and proline metabolism;<br>Aspartate metabolism                          | Aging (Down) | -                                                                         |
| Ethanolamine (Liver)  | Ethanolamine exists in all living species, ranging from bacteria to plants to humans.                                       | An initial precursor for the biosynthesis of two primary phospholipid classes, phosphatidylcholine (PC) and phosphatidylethanolamine (PE).             | Aging (Down) | Ethanolamine protects against hyperlipidemia in aged mice [22].           |
| Glutaric acid (Liver) | Glutaric acid is naturally produced in the body during the metabolism of some amino acids, including lysine and tryptophan. | Glutaric acid may cause irritation to the skin and eyes. Glutaric acid acts as an acidogen and a metabotoxin when present in sufficiently high levels. | Aging (Up)   | -                                                                         |
| Ascorbic acid (Liver) | Ascorbic acid is found naturally in citrus fruits and many                                                                  | Necessary to maintain connective tissue and bone.                                                                                                      | Aging (Up)   | Ascorbic acid inhibits obesity and nonalcoholic fatty liver disease [23]. |

|                                      |                                                                                                                       |                                                                                                          |                                                   |                                                                      |
|--------------------------------------|-----------------------------------------------------------------------------------------------------------------------|----------------------------------------------------------------------------------------------------------|---------------------------------------------------|----------------------------------------------------------------------|
|                                      | vegetables and is an essential nutrient in human diets.                                                               | Tyrosine metabolism                                                                                      |                                                   |                                                                      |
| 2-aminobutyric acid<br>(Liver)       | A non-essential amino acid; Biosynthesized by transamination of oxobutyrate, a metabolite in isoleucine biosynthesis. | Non-proteogenic amino acid                                                                               | Aging (Down)                                      | -                                                                    |
| 2-monoolein<br>(Liver)               | A major end product of the intestinal digestion of dietary fats in animals via the enzyme pancreatic lipase.          | Act as emulsifiers, helping to mix ingredients such as oil and water that would not otherwise blend well | Aging (Up)                                        | -                                                                    |
| 3-(1-pyrazolyl)-l-alanine<br>(Liver) | L-alanine derivative                                                                                                  | A non-proteinogenic L- $\alpha$ -amino acid                                                              | Aging (Up)                                        | -                                                                    |
| Glycolic acid<br>(Liver, serum)      | A metabolite in bacteria such as <i>Acetobacter</i> , <i>Escherichia</i>                                              | A nephrotoxin if consumed orally; A known inhibitor of tyrosinase; Renal toxicity                        | Aging (Up in the liver)<br>FXR KO (Down in serum) | -                                                                    |
| Beta-glutamic acid<br>(Liver)        | A metabolite found in the aging mouse brain; A natural product found in <i>Chondria armata</i>                        | A marine metabolite and an algal metabolite.                                                             | Aging (Up)                                        | -                                                                    |
| Uridine<br>(Liver)                   | Uridine can be synthesized from uracil. Uridine is found in many foods (anything containing RNA).                     | A nucleoside consisting of uracil and D-ribose and a component of RNA; Pyrimidine metabolism             | Aging (Up)<br>FXR KO (Up)                         | Uridine alleviates carbon tetrachloride-induced liver fibrosis [24]. |



|                             |                                                                                                                                                                                                                                                                                                                  |                                                                                                                                  |              |                                                                                                                                                                                                       |
|-----------------------------|------------------------------------------------------------------------------------------------------------------------------------------------------------------------------------------------------------------------------------------------------------------------------------------------------------------|----------------------------------------------------------------------------------------------------------------------------------|--------------|-------------------------------------------------------------------------------------------------------------------------------------------------------------------------------------------------------|
| Serine<br>(Liver)           | Serine is found in all organisms ranging from bacteria to plants to animals.                                                                                                                                                                                                                                     | Proteinogenic amino acid;<br>Nitrogen metabolism;<br>Starch and sucrose metabolism;<br>Glycine, serine, and threonine metabolism | Aging (Down) | Reduced hepatic serine contributes to the development of fatty liver disease [25].                                                                                                                    |
| Palmitoleic acid<br>(Liver) | A common constituent of the glycerides of human adipose tissue; From gut bacteria, such as <i>Akkermansia muciniphila</i> ; Macadamia oil ( <i>Macadamia integrifolia</i> ) and sea buckthorn oil ( <i>Hippophae rhamnoides</i> ) are botanical sources of palmitoleic acid, containing 22 and 40% respectively. | A monounsaturated fatty acid; Reduce hepatic gluconeogenesis                                                                     | Aging (Down) | Palmitoleic acid reduces high fat diet-induced liver inflammation [26].<br>Palmitoleic acid improves metabolic functions in fatty liver [27].<br>Palmitoleic acid protects against hypertension [28]. |
| Lactic acid<br>(Liver)      | In animals, L-lactate is constantly produced from pyruvate via the enzyme lactate dehydrogenase in a process of fermentation during normal metabolism and exercise. Exogenous food such as beverages.                                                                                                            | Gluconeogenesis;<br>Pyruvate metabolism                                                                                          | Aging (Up)   | -                                                                                                                                                                                                     |

|                                 |                                                                                                                                                                          |                                                                                    |                               |                                                                       |
|---------------------------------|--------------------------------------------------------------------------------------------------------------------------------------------------------------------------|------------------------------------------------------------------------------------|-------------------------------|-----------------------------------------------------------------------|
| Lithocholic acid<br>(Liver)     | It is formed from chenodeoxycholate by bacterial action and is usually conjugated with glycine or taurine.                                                               | Secondary bile acid; It acts as a detergent to solubilize fats for absorption.     | Aging (Down)                  | Lithocholic acid inhibits inflammation and regulates metabolism [29]. |
| Pyruvate<br>(Serum)             | Pyruvate is found in all living organisms ranging from bacteria to plants to humans. It is intermediate compound in the metabolism of carbohydrates, proteins, and fats. | Urea cycle;<br>Glucose-alanine cycle;<br>Glycine, serine, and threonine metabolism | Aging (Up)                    | -                                                                     |
| 1.3-Dihydroxyacetone<br>(Serum) | It is often derived from plant sources such as sugar beets and sugar cane, by the fermentation of glycerin.                                                              | In combination with naphthoquinones, it acts as a sun screening agent.             | Aging (Down)                  | -                                                                     |
| Acetone<br>(Serum)              | Acetone is produced and disposed of in the human body through normal metabolic processes. It is normally present in blood and urine.                                     | Ketone body metabolism                                                             | Aging (Down)<br>FXR KO (Down) | -                                                                     |
| Methylamine (Urine)             | Methylamine occurs endogenously from amine catabolism; Methylamines produced by microbial                                                                                | Tyrosine metabolism                                                                | Aging (Down)                  | -                                                                     |

|                                        |                                                                                                         |                                                                                                                                                                                                                     |                             |                                                   |
|----------------------------------------|---------------------------------------------------------------------------------------------------------|---------------------------------------------------------------------------------------------------------------------------------------------------------------------------------------------------------------------|-----------------------------|---------------------------------------------------|
|                                        | metabolism of dietary choline and L-carnitine.<br>Exogenous food such as teas                           |                                                                                                                                                                                                                     |                             |                                                   |
| N.N-Dimethylglycine<br>(Urine)         | A derivative of the amino acid glycine                                                                  | A microbial metabolite; A biomarker for the consumption of legumes                                                                                                                                                  | Aging (Down)<br>FXR KO (Up) | -                                                 |
| Betaine<br>(Urine)                     | Exogenous food such as fruits (e.g., berries)                                                           | Glycine, serine, and threonine metabolism; Methionine metabolism                                                                                                                                                    | Aging (Up)                  | Betaine inhibits inflammation and apoptosis [30]. |
| 2-Hydroxyisobutyrate<br>(Urine)        | Non-essential, secondary metabolite                                                                     | May serve as defense or signaling molecules.                                                                                                                                                                        | Aging (Up)<br>FXR KO (Up)   | -                                                 |
| Sn-Glycero-3-phosphocholine<br>(Urine) | Formed in the breakdown of phosphatidylcholine                                                          | One of the four major organic osmolytes in renal medullary cells, changing their intracellular osmolyte concentration in parallel with extracellular tonicity during cellular osmoadaptation.<br>Retinol metabolism | Aging (Up)<br>FXR KO (Up)   | -                                                 |
| 3-Indoxylsulfate<br>(Urine)            | A metabolite of the common amino acid tryptophan and is derived through the consumption, digestion, and | A uremic toxin and cardiotoxin                                                                                                                                                                                      | Aging (Up)                  | -                                                 |

|                                   |                                                                                                                                                                                                                                                                      |                                                                                                                                                       |                              |                                                                                |
|-----------------------------------|----------------------------------------------------------------------------------------------------------------------------------------------------------------------------------------------------------------------------------------------------------------------|-------------------------------------------------------------------------------------------------------------------------------------------------------|------------------------------|--------------------------------------------------------------------------------|
|                                   | microbial processing of protein-rich foods. Indoxyl sulfate is technically a bacterial co-metabolite, meaning that it is derived from both bacterial and host metabolism.                                                                                            |                                                                                                                                                       |                              |                                                                                |
| Ascorbate<br>Vitamin C<br>(Urine) | An essential nutrient in human diets, including citrus fruits and many vegetables;<br>A microbial metabolite produced by Ketogulonicigenium                                                                                                                          | A water-soluble vitamin; Antioxidant; An electron donor for enzymes involved in collagen hydroxylation, biosynthesis of carnitine and norepinephrine. | Aging (Down)                 | Ascorbate ameliorates factors linked to Alzheimer's disease pathogenesis [31]. |
| Melibiose<br>(Liver)              | This sugar is produced and metabolized only by enteric and lactic acid bacteria and other microbes, such as <i>Escherichia</i> . It is not an endogenous metabolite but may be obtained from the consumption of partially fermented molasses, brown sugar, or honey. | Galactose metabolism                                                                                                                                  | Aging (Up),<br>FXR KO (Down) | -                                                                              |
| Glucoheptulose<br>(Liver)         | L-arabinose                                                                                                                                                                                                                                                          | -                                                                                                                                                     | FXR KO (Down)                | -                                                                              |

|                                 |                                                                                                                                             |                                                                                                                              |               |                                                                                |
|---------------------------------|---------------------------------------------------------------------------------------------------------------------------------------------|------------------------------------------------------------------------------------------------------------------------------|---------------|--------------------------------------------------------------------------------|
| UDP-N-acetylglucosamine (Liver) | Exogenous, food such as animal food                                                                                                         | Glucose sensor; Amino sugar metabolism; Elevated UDP-N-acetylglucosamine has an effect on insulin-stimulated glucose uptake. | FXR KO (Up)   | -                                                                              |
| Uridine (Liver)                 | Synthesized from uracil; Uridine is found in many foods (anything containing RNA).                                                          | Pyrimidine metabolism                                                                                                        | FXR KO (Up)   | Uridine alleviates carbon tetrachloride induced liver fibrosis [24].           |
| Isomaltose (Liver)              | A product of the caramelization of glucose; Exogenous, food such as beverages                                                               | Starch and sucrose metabolism; Metabolic pathways                                                                            | FXR KO (Up)   | Isomaltulose improves insulin resistance in NAFLD patients [32].               |
| Ribose-5-phosphate (Liver)      | Exogenous, food such as fruits; A product and an intermediate of the pentose phosphate pathway.                                             | Purine metabolism; Pentose phosphate pathway                                                                                 | FXR KO (Down) | Ribose-5-phosphate isomerase A overexpression induces oncogenesis in HCC [33]. |
| 2-hydroxybutanoic acid (Liver)  | Primarily produced in mammalian hepatic tissues that catabolize L-threonine or synthesize glutathione. Exogenous, food such as animal foods | An early marker for both insulin resistance and impaired glucose regulation                                                  | FXR KO (Down) | -                                                                              |

|                              |                                                                                              |                                                                                                                                                                       |                                                        |                                                                            |
|------------------------------|----------------------------------------------------------------------------------------------|-----------------------------------------------------------------------------------------------------------------------------------------------------------------------|--------------------------------------------------------|----------------------------------------------------------------------------|
| Arachidic acid<br>(Liver)    | A minor constituent of butter, perilla oil, peanut oil, corn oil, and cocoa butter.          | Saturated, long-chain fatty acids                                                                                                                                     | FXR KO (Down)                                          | Arachidic acid induces liver dysfunction in hyperglycaemic rats [34].      |
| Malic acid<br>(Liver, serum) | Exogenous, food such as herbs and spices                                                     | Citric acid cycle;<br>Gluconeogenesis;<br>Pyruvate metabolism;<br>Malate-aspartate shuttle                                                                            | FXR KO (Up in the liver)<br>FXR KO (Down in the serum) | Malic acid is increased in NAFLD [35]                                      |
| Succinate<br>(Serum, Urine)  | Exogenous, food such as fruits                                                               | A cell signaling molecule; Succinate alters gene expression patterns, thereby modulating the epigenetic landscape or it can exhibit hormone-like signaling functions. | FXR KO (Down in serum and up in urine)                 | Elevated extracellular succinate in liver tissue drives inflammation [36]. |
| Alanine<br>(Serum)           | It is formed in vivo by the degradation of dihydrouracil and carnosine.                      | A neurotoxin; A mitochondrial toxin; A metabotoxin;<br>Beta-alanine metabolism                                                                                        | FXR KO (Down)                                          | -                                                                          |
| Glutamine<br>(Serum)         | Non-essential amino acid                                                                     | Proteinogenic $\alpha$ -amino acid; Glutamate metabolism; Purine metabolism; Urea cycle                                                                               | FXR KO (Up)                                            | Glutamine is beneficial for human inflammatory bowel disease [37].         |
| Phenylalanine<br>(Serum)     | An essential amino acid and the precursor of the amino acid tyrosine, highly concentrated in | Proteinogenic $\alpha$ -amino acid; A precursor for catecholamines including                                                                                          | FXR KO (Up)                                            | -                                                                          |

|                    |                                                                                                                                                                |                                                                                                                                    |               |                                                                                                |
|--------------------|----------------------------------------------------------------------------------------------------------------------------------------------------------------|------------------------------------------------------------------------------------------------------------------------------------|---------------|------------------------------------------------------------------------------------------------|
|                    | high protein foods, such as meat, cottage cheese, and wheat germ. An additional dietary source of phenylalanine is artificial sweeteners containing aspartame. | tyramine, dopamine, epinephrine, and norepinephrine; A neurotoxin and a metabotoxin.                                               |               |                                                                                                |
| Tyrosine (Serum)   | Exogenous, food such as fruits                                                                                                                                 | Proteinogenic $\alpha$ -amino acid; Tyrosine metabolism                                                                            | FXR KO (Down) | -                                                                                              |
| Glucose (Serum)    | Exogenous, food such as fruits                                                                                                                                 | Primary source of energy for all living organisms, Glycolysis; Gluconeogenesis; Lactose synthesis                                  | FXR KO (Up)   | -                                                                                              |
| Creatinine (Urine) | Exogenous, food such as herbs and spices                                                                                                                       | An amino acid derivative; A waste product and is normally eliminated in large quantities by the kidneys through urinary excretion. | FXR KO (Down) | -                                                                                              |
| Taurine (Urine)    | An essential amino acid; Foods such as vegetables, animal and fish protein                                                                                     | A neurotransmitter in the brain; Taurine and hypotaurine metabolism; Primary bile acid biosynthesis                                | FXR KO (Down) | Taurine displays potential ameliorating effects against different neurological disorders [38]. |

|                                 |                                                                                                                                                                                                                                                      |                                                                                                                  |               |                                                                                                                      |
|---------------------------------|------------------------------------------------------------------------------------------------------------------------------------------------------------------------------------------------------------------------------------------------------|------------------------------------------------------------------------------------------------------------------|---------------|----------------------------------------------------------------------------------------------------------------------|
| N-Phenylacetylglutamine (Urine) | Exogenous, food such as animal food                                                                                                                                                                                                                  | A surrogate biomarker for phospholipidosis                                                                       | FXR KO (Up)   | A biomarker for dimethylnitrosamine-induced hepatic fibrosis in a rat model [39].                                    |
| Guanidoacetate (Urine)          | Exists naturally in all vertebrates; Formed primarily in the kidneys by transferring the guanidine.                                                                                                                                                  | $\alpha$ -amino acid and derivatives; Arginine and proline metabolism; Glycine, serine, and threonine metabolism | FXR KO (Down) | -                                                                                                                    |
| trans-Aconitate (Urine)         | Normally present in human urine; Detected in foods, such as garden tomato fruits, root vegetables, soybeans, and rice.                                                                                                                               | A biomarker for the consumption of soy products                                                                  | FXR KO (Down) | -                                                                                                                    |
| Cis-Aconitate (Urine)           | Cow milk                                                                                                                                                                                                                                             | Glutaminolysis and cancer pathway; Citric acid cycle                                                             | FXR KO (Down) | -                                                                                                                    |
| N,N-Dimethylglycine (Urine)     | Exogenous, food such as animal foods;<br>An amino acid derivative found in the cells of all plants and animals and can be obtained in the diet in small amounts from grains and meat; A byproduct of homocysteine metabolism; A microbial metabolite | A biomarker for the consumption of legumes; Glycine, serine, and threonine metabolism; Methionine metabolism     | FXR KO (Up)   | Plasma N,N-Dimethylglycine is markedly decreased in Alzheimer's disease patients compared with normal controls [40]. |

HCC, hepatocellular carcinoma; NAFLD, nonalcoholic liver disease; -, unknown.



## References

1. Yamagishi S, Ohta M. Serum 1,5-anhydro-D-glucitol levels in liver cirrhosis. *Acta Diabetol* 1998;35:65-66.
2. Koga M, Murai J, Saito H, et al. 1,5-Anhydroglucitol levels are low irrespective of plasma glucose levels in patients with chronic liver disease. *Ann Clin Biochem* 2011;48:121-125.
3. Zhang L, Zhao Y, Xie Z, et al. 1,5-Anhydroglucitol Predicts Mortality in Patients with HBV-Related Acute-on-chronic Liver Failure. *J Clin Transl Hepatol* 2022;10:651-659.
4. Nagao K, Inoue N, Wang Y-M, et al. Dietary conjugated linoleic acid alleviates nonalcoholic fatty liver disease in Zucker (fa/fa) rats. *The Journal of nutrition* 2005;135:9-13.
5. Lou-Bonafonte JM, Martínez-Beamonte R, Sanclemente T, et al. Current insights into the biological action of squalene. *Mol Nutr Food Res* 2018:e1800136.
6. Jenkins B, West JA, Koulman A. A review of odd-chain fatty acid metabolism and the role of pentadecanoic Acid (c15:0) and heptadecanoic Acid (c17:0) in health and disease. *Molecules* 2015;20:2425-2444.
7. Albillos A, de Gottardi A, Rescigno M. The gut-liver axis in liver disease: Pathophysiological basis for therapy. *J Hepatol* 2020;72:558-577.
8. Bjune MS, Lindquist C, Hallvardsson Stafsnes M, et al. Plasma 3-hydroxyisobutyrate (3-HIB) and methylmalonic acid (MMA) are markers of hepatic mitochondrial fatty acid oxidation in male Wistar rats. *Biochim Biophys Acta Mol Cell Biol Lipids* 2021;1866:158887.
9. Rao Y, Kuang Z, Li C, et al. Gut Akkermansia muciniphila ameliorates metabolic dysfunction-associated fatty liver disease by regulating the metabolism of L-aspartate via gut-liver axis. *Gut Microbes* 2021;13:1-19.
10. Dos Santos ALS, Anastácio LR. The impact of L-branched-chain amino acids and L-leucine on malnutrition, sarcopenia, and other outcomes in patients with chronic liver disease. *Expert Rev Gastroenterol Hepatol* 2021;15:181-194.
11. DiNicolantonio JJ, McCarty MF, JH OK. Role of dietary histidine in the prevention of obesity and metabolic syndrome. *Open Heart* 2018;5:e000676.
12. Nagamani SCS, Ali S, Izem R, et al. Biomarkers for liver disease in urea cycle disorders. *Mol Genet Metab* 2021;133:148-156.
13. Trupp M, Jonsson P, Ohrfelt A, et al. Metabolite and peptide levels in plasma and CSF differentiating healthy controls from patients with newly diagnosed Parkinson's disease. *J Parkinsons Dis* 2014;4:549-560.
14. Wang H, Wu Y, Tang W. Methionine cycle in nonalcoholic fatty liver disease and its potential applications. *Biochem Pharmacol* 2022;200:115033.

15. Wang S, Ding Y, Dong R, et al. Canagliflozin improves liver function in rats by upregulating asparagine synthetase. *Pharmacology* 2021;106:606-615.
16. Chung M, Ma J, Patel K, et al. Fructose, high-fructose corn syrup, sucrose, and nonalcoholic fatty liver disease or indexes of liver health: a systematic review and meta-analysis. *Am J Clin Nutr* 2014;100:833-849.
17. Li D, Ke Y, Zhan R, et al. Trimethylamine-N-oxide promotes brain aging and cognitive impairment in mice. *Aging Cell* 2018;17:e12768.
18. Tan X, Liu Y, Long J, et al. Trimethylamine N-Oxide aggravates liver steatosis through modulation of bile acid metabolism and inhibition of farnesoid x receptor signaling in nonalcoholic fatty liver disease. *Mol Nutr Food Res* 2019;63:e1900257.
19. Lee KS, Cho Y, Kim H, et al. Association of metabolomic change and treatment response in patients with non-alcoholic fatty liver disease. *Biomedicines* 2022;10.
20. Jian H, Miao S, Liu Y, et al. Dietary valine ameliorated gut health and accelerated the development of nonalcoholic fatty liver disease of laying hens. *Oxid Med Cell Longev* 2021;2021:4704771.
21. Hirvonen OP, Lehti M, Kyröläinen H, et al. Heme oxygenase-1 and blood bilirubin are gradually activated by oral D-glyceric acid. *Antioxidants (Basel)* 2022;11.
22. Ding L, Zhang L, Shi H, et al. The protective effect of dietary epa-enriched ethanolamine plasmalogens against hyperlipidemia in aged mice. *European Journal of Lipid Science and Technology* 2020;122:2000179.
23. Lee H, Ahn J, Shin SS, et al. Ascorbic acid inhibits visceral obesity and nonalcoholic fatty liver disease by activating peroxisome proliferator-activated receptor  $\alpha$  in high-fat-diet-fed C57BL/6J mice. *Int J Obes (Lond)* 2019;43:1620-30.
24. Zheng WV, Li Y, Cheng X, et al. Uridine alleviates carbon tetrachloride-induced liver fibrosis by regulating the activity of liver-related cells. *J Cell Mol Med* 2022;26:840-854.
25. Sim WC, Lee W, Sim H, et al. Downregulation of PHGDH expression and hepatic serine level contribute to the development of fatty liver disease. *Metabolism* 2020;102:154000.
26. Souza CO, Teixeira AAS, Biondo LA, et al. Palmitoleic acid reduces high fat diet-induced liver inflammation by promoting PPAR- $\gamma$ -independent M2a polarization of myeloid cells. *Biochim Biophys Acta Mol Cell Biol Lipids* 2020;1865:158776.
27. de Souza CO, Teixeira AAS, Biondo LA, et al. Palmitoleic acid improves metabolic functions in fatty liver by PPAR $\alpha$ -dependent AMPK activation. *J Cell Physiol* 2017;232:2168-2177.
28. Tang J, Yang B, Yan Y, et al. Palmitoleic acid protects against hypertension by inhibiting NF- $\kappa$ B-mediated inflammation. *Mol Nutr Food Res*

2021;65:e2001025.

29. Shao J, Ge T, Tang C, et al. Synergistic anti-inflammatory effect of gut microbiota and lithocholic acid on liver fibrosis. *Inflamm Res* 2022;71:1389-1401.
30. Veskovic M, Mladenovic D, Milenkovic M, et al. Betaine modulates oxidative stress, inflammation, apoptosis, autophagy, and Akt/mTOR signaling in methionine-choline deficiency-induced fatty liver disease. *Eur J Pharmacol* 2019;848:39-48.
31. Monacelli F, Acquarone E, Giannotti C, et al. Vitamin C, Aging and Alzheimer's Disease. *Nutrients* 2017;9.
32. Kawaguchi T, Nakano D, Oriishi T, et al. Effects of isomaltulose on insulin resistance and metabolites in patients with non-alcoholic fatty liver disease: A metabolomic analysis. *Mol Med Rep* 2018;18:2033-2042.
33. Ciou SC, Chou YT, Liu YL, et al. Ribose-5-phosphate isomerase A regulates hepatocarcinogenesis via PP2A and ERK signaling. *Int J Cancer* 2015;137:104-115.
34. Moisés Laparra J, Díez-Municio M, Javier Moreno F, et al. Kojibiose ameliorates arachidic acid-induced metabolic alterations in hyperglycaemic rats. *Br J Nutr* 2015;114:1395-1402.
35. Zhu MN, Zhao CZ, Wang CZ, et al. Dataset for liver metabolomic profile of highland barley *Monascus purpureus* went extract-treated golden hamsters with nonalcoholic fatty liver disease. *Data Brief* 2022;40:107773.
36. Mills EL, Harmon C, Jedrychowski MP, et al. UCP1 governs liver extracellular succinate and inflammatory pathogenesis. *Nat Metab* 2021;3:604-617.
37. Kim MH, Kim H. The Roles of Glutamine in the Intestine and its implication in intestinal diseases. *Int J Mol Sci* 2017;18.
38. Jakaria M, Azam S, Haque ME, et al. Taurine and its analogs in neurological disorders: Focus on therapeutic potential and molecular mechanisms. *Redox Biol* 2019;24:101223.
39. Ju HK, Chung HW, Lee HS, et al. Investigation of metabolite alteration in dimethylnitrosamine-induced liver fibrosis by GC-MS. *Bioanalysis* 2013;5:41-51.
40. Wang G, Zhou Y, Huang FJ, et al. Plasma metabolite profiles of Alzheimer's disease and mild cognitive impairment. *J Proteome Res* 2014;13:2649-2658.
